# Supplementary material
Source: PubMed Central journal article supplement (PMC2423006)
Supplement: NIHMS1798-supplement-Supp_figure_1.pdf [file NIHMS1798-supplement-Supp_figure_1.pdf]

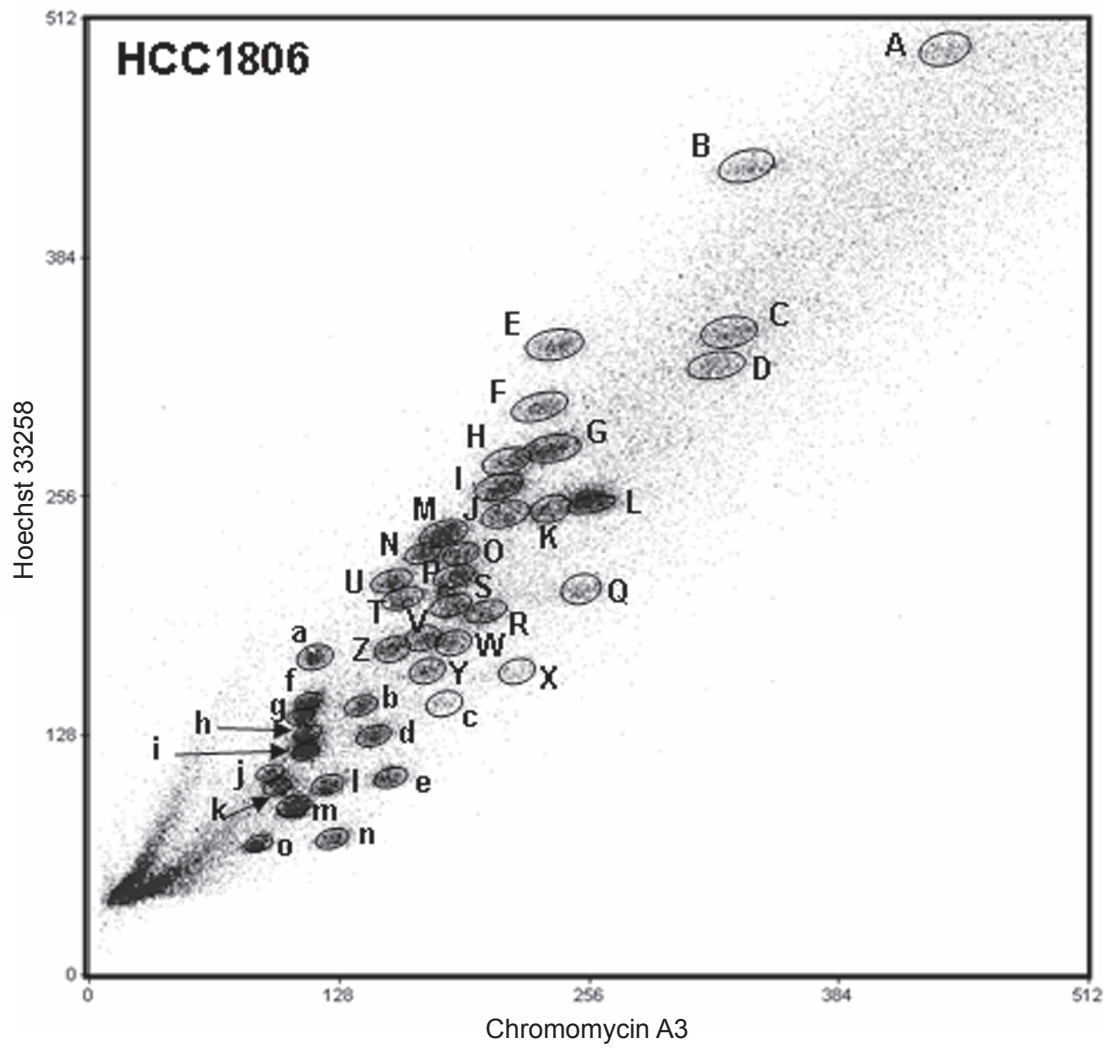

**Supplementary Figure 1** Flow karyotype of chromosomes from the breast cancer cell line HCC1806. Axes as in figure 1. The 'peaks' are designated A to o.
