# Supplementary material
Source: PubMed Central journal article supplement (PMC2423006)
Supplement: NIHMS1798-supplement-Supp_figure_2.pdf [file NIHMS1798-supplement-Supp_figure_2.pdf]

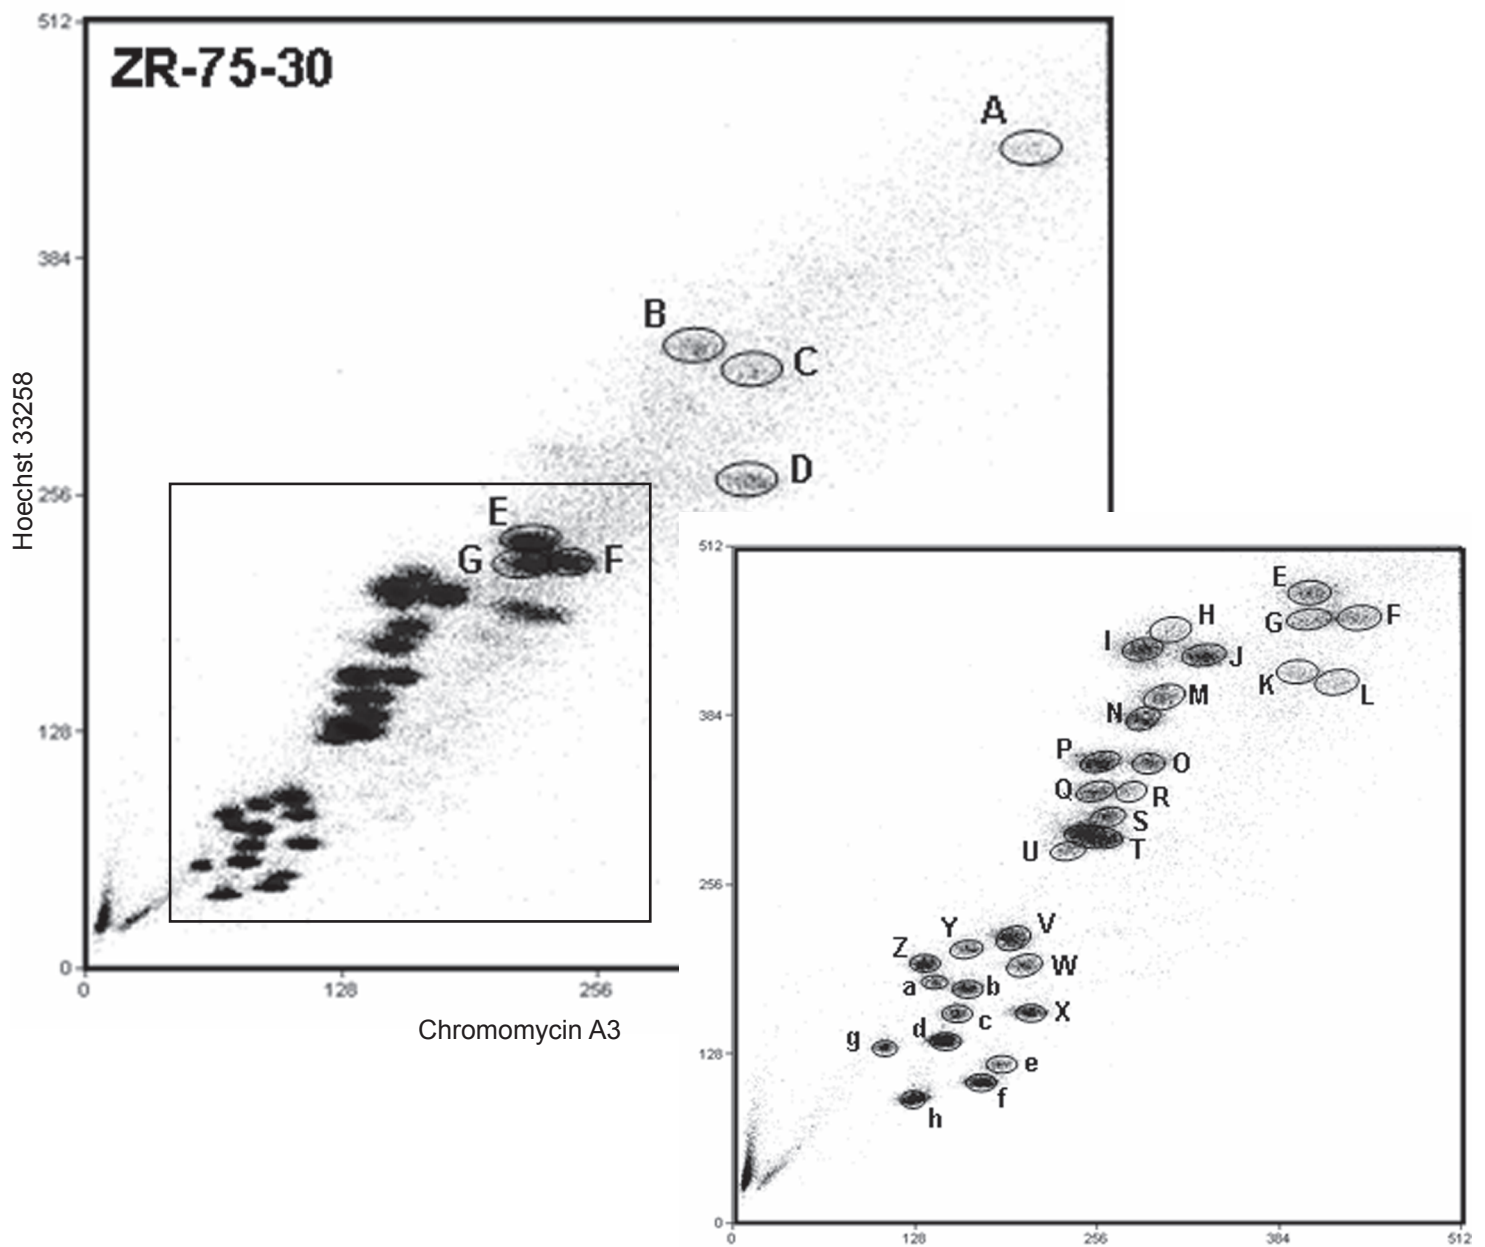

**Supplementary Figure 2** Flow karyotype of chromosomes from the breast cancer cell line ZR-75-30. Axes as in figure 1. The 'peaks' are designated A to h. In the inset the gain has been increased to show the smaller peaks more clearly.
