# Supplementary material
Source: PubMed Central journal article supplement (PMC2423006)
Supplement: NIHMS1798-supplement-Supp_figure_3.pdf [file NIHMS1798-supplement-Supp_figure_3.pdf]

### a. HCC1187

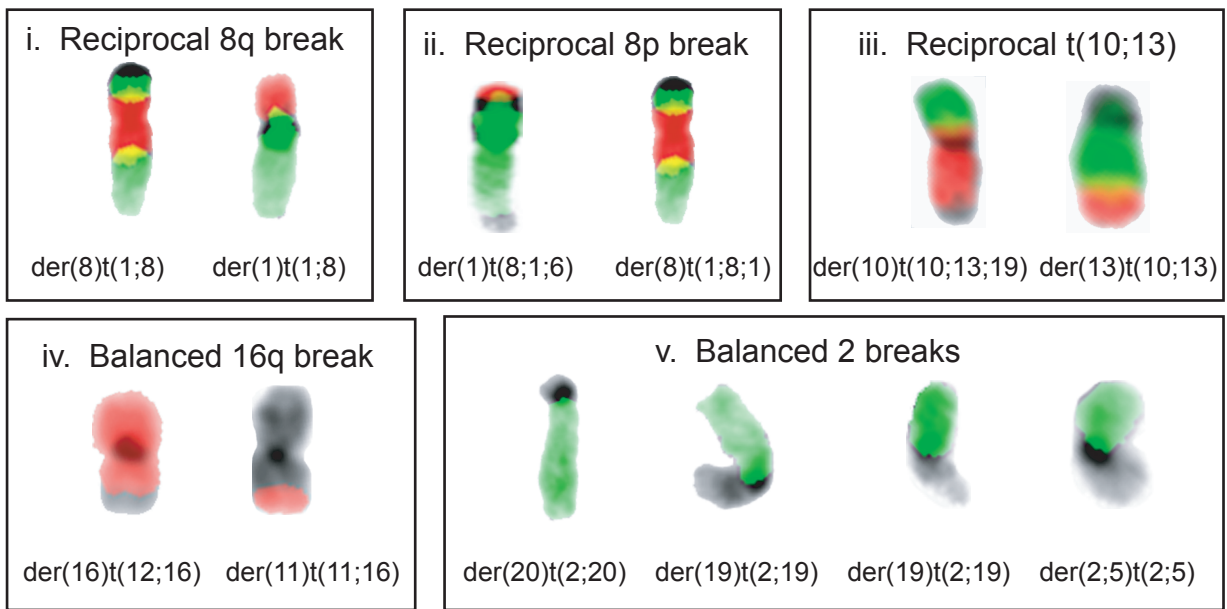

### b. HCC1806

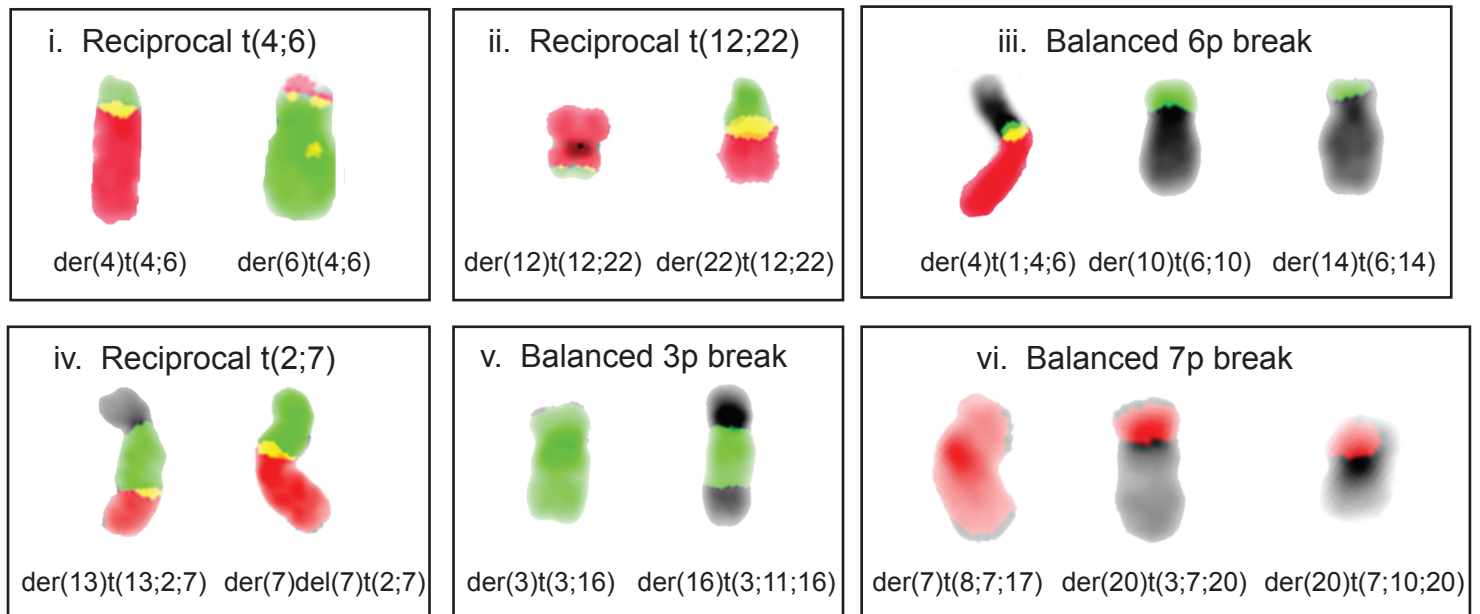

### c. ZR-75-30

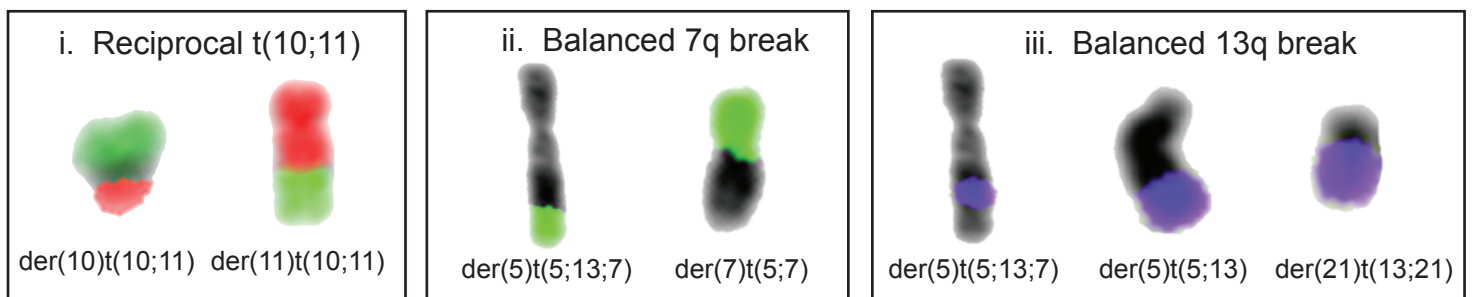

**Supplementary Figure 3** Confirmation of balanced chromosome translocations. Conventional chromosome painting was used to confirm the chromosome composition of the rearranged chromosomes that contain balanced breakpoints.

(a) Hybridisation of HCC1187 metaphases with: chromosome 1 (green) and chromosome 8 (red) paints (i and ii); chromosome 10 (red) and chromosome 13 (green) paints (iii); chromosome 16 (red) (iv); chromosome 2 (green) (v).

(b) Hybridisation of HCC1806 metaphases with: chromosome 4 (red) and chromosome 6 (green) paints (i); chromosome 12 (red) and chromosome 22 (green) paints (ii); chromosome 6 (green) (iii); chromosome 2 (green) and chromosome 7 (red) paints (iv); chromosome 3 (green) (v); chromosome 7 (red) (vi). The balanced translocation between chromosome 1 and 5 in this cell line occurs at the centromere and is not shown.

(c) Hybridisation of ZR-75-30 metaphases with: chromosome 10 (green) and chromosome 11 (red) paints (i); chromosome 7 (green); chromosome 13 (blue).
