# Supplementary material
Source: PubMed Central journal article supplement (PMC2423006)
Supplement: NIHMS1798-supplement-Supp_figure_4.pdf [file NIHMS1798-supplement-Supp_figure_4.pdf]

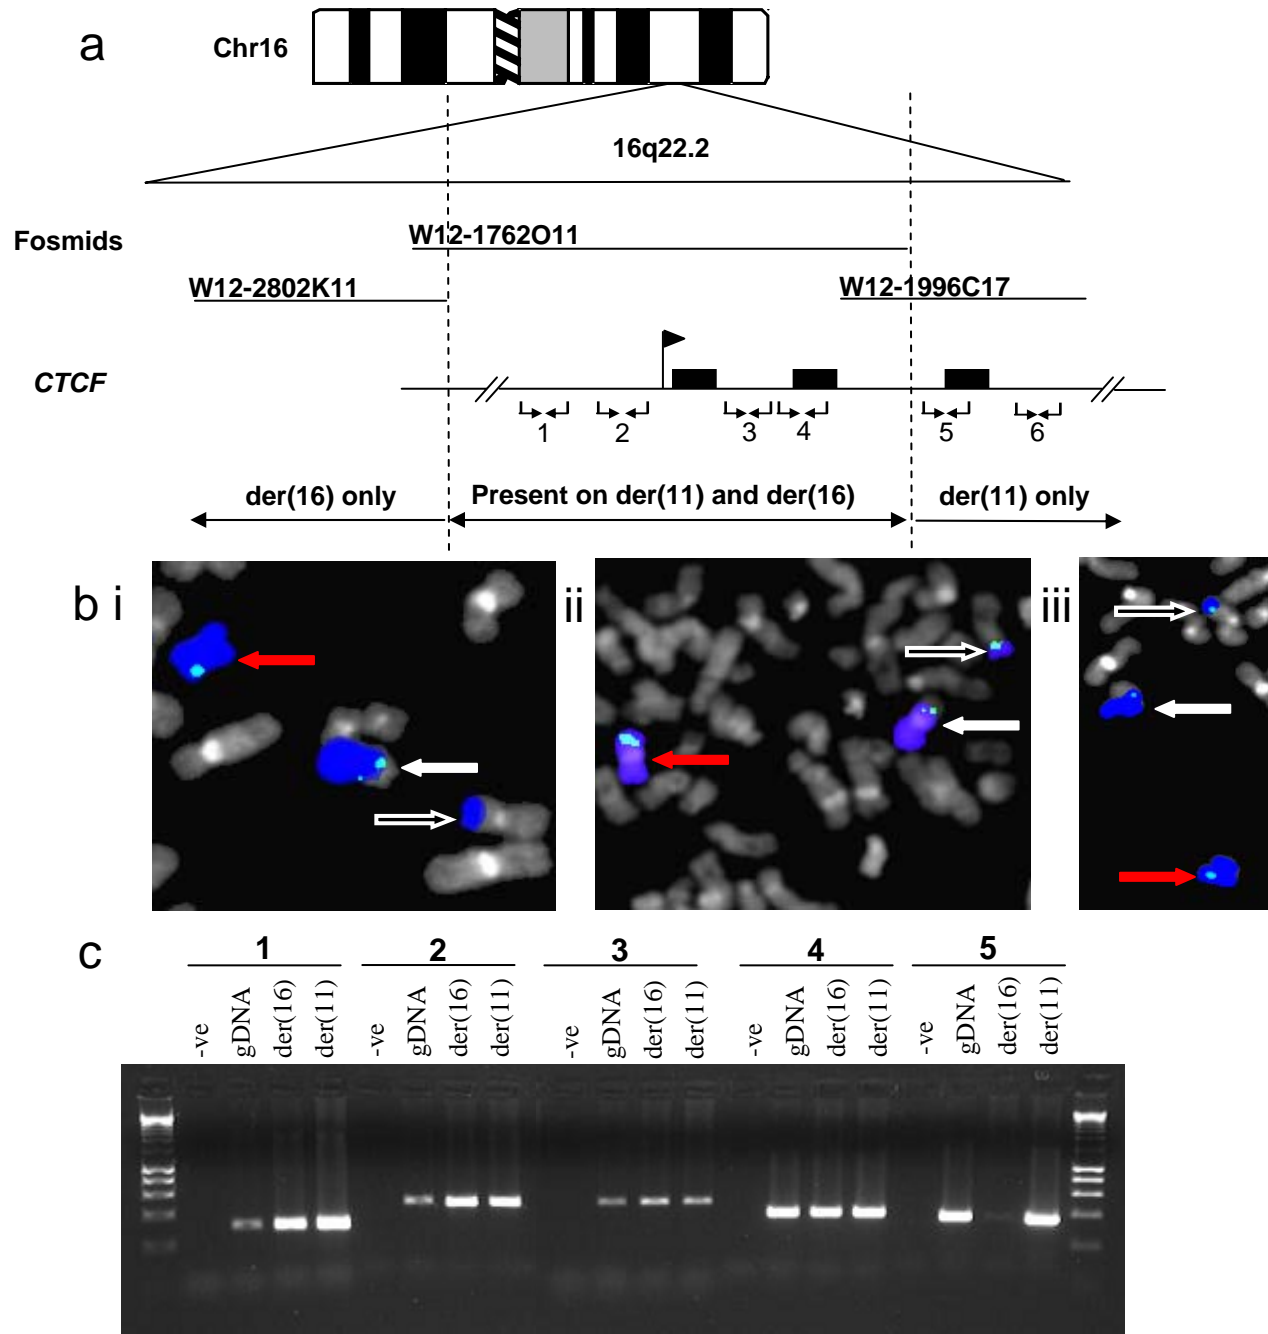

**Supplementary figure 4.** Confirmation of a translocation breakpoint at *CTCF* in HCC1187.

- (a) Schematic to show the approximate location of fosmids used in FISH mapping and PCR primers *CTCF*1-6 (1-6 respectively) (not to scale). A schematic of *CTCF* is shown (not to scale). Exons are represented with black boxes and the promoter with a black flag. Dotted lines represent approximate breakpoints, which are consistent with the Nimblegen array hybridisations.
- (b) Breakpoint mapping by FISH using fosmids W12-2802K11(i), W12-1762O11(ii) and W12-1996C17(iii). Fosmids are shown in green and chromosome 16 is shown in blue. Normal chromosome 16 is indicated with a red arrow, der(16) with a solid white arrow and the der(11) with an open arrow.
- (c) Breakpoint mapping by PCR on sorted chromosomes. Results with primer pairs *CTCF*1-5 (1-5) are shown. Primer pair 6 was run separately (not shown). Lanes are labelled -ve (water control), gDNA (HCC1187 genomic DNA), der(16) (der(16)t(11;12;16)) and der(11) (der(11)t(11;16)).
