# Supplementary material
Source: PubMed Central journal article supplement (PMC2423006)
Supplement: NIHMS1798-supplement-Supp_figure_5.pdf [file NIHMS1798-supplement-Supp_figure_5.pdf]

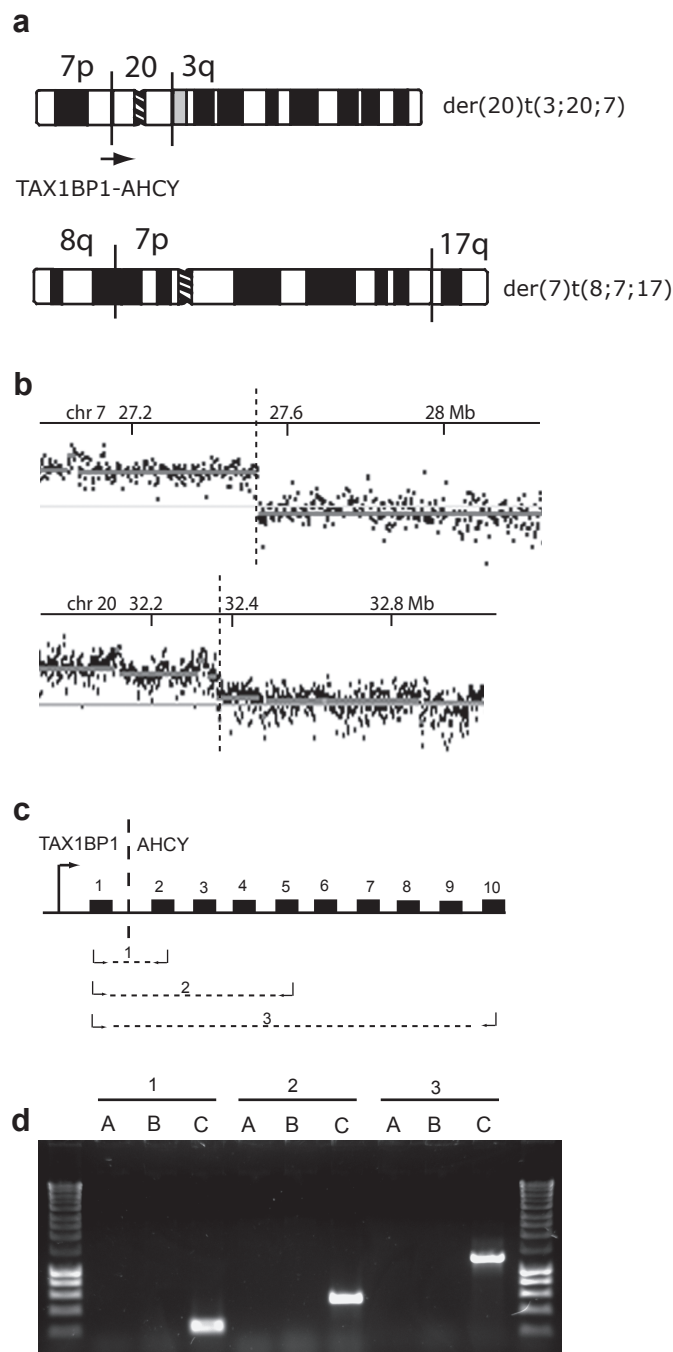

**Supplementary Figure 5 Fusion of *TAX1BP1* and *AHCY***

- (a) Schematic representation of the products of the balanced translocation at chromosome 7p15.2 in HCC1806. The approximate location of the *TAX1BP1* and *AHCY* genes is shown on the der(20) where fusion occurs.
- (b) Hybridisation of der(20)t(3;7;20) to a custom Nimblegen oligonucleotide array covering specified regions on chromosomes 7 and 20. Breakpoints are indicated with a broken line.
- (c) Schematic representation of the *TAX1BP1-AHCY* fusion transcript (not to scale). Relevant exons are shown as numbered black boxes, the promoter is indicated with a black arrow and the breakpoint is indicated with a broken line. Primer pairs used in RT-PCR are shown with black arrows below the relevant exons and products are labelled 1, 2 and 3.
- (d) *TAX1BP1-AHCY* RT-PCR fusion transcripts are shown on an ethidium stained gel. Lanes are labelled A (negative control), B (HB4a) and C (HCC1806). Fusion products are shown with primer pairs 1, 2 and 3 as indicated in part c.
