# Supplementary material
Source: PubMed Central journal article supplement (PMC2423006)
Supplement: NIHMS1798-supplement-Supp_figure_6.pdf [file NIHMS1798-supplement-Supp_figure_6.pdf]

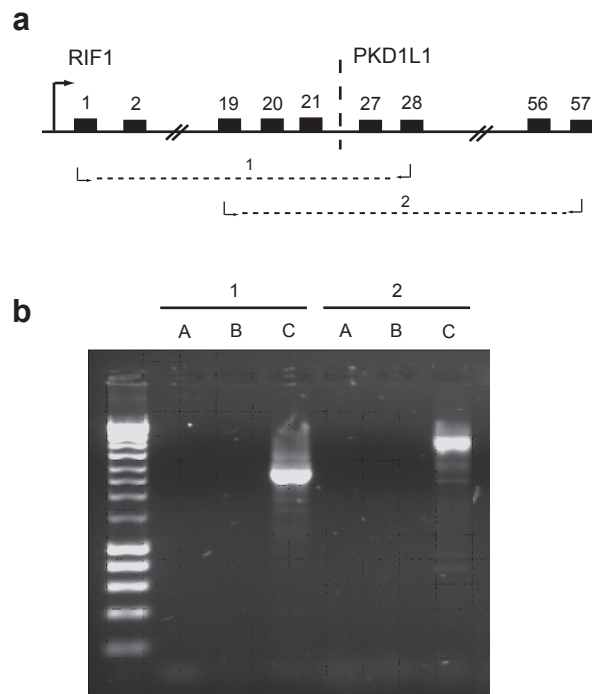

**Supplementary Figure 6** Fusion of *RIF1* and *PKD1L1*

(a) Schematic representation of the *RIF1-PKD1L1* fusion transcript (not to scale). Relevant exons are shown as numbered black boxes, the promoter is indicated with a black arrow and the breakpoint is indicated with a broken line. Primer pairs used in RT-PCR are shown with black arrows below the relevant exons and products are labelled 1 and 2.

(b) *RIF1-PKD1L1* RT-PCR fusion transcripts are shown on an ethidium stained gel. Lanes are labelled A (negative control), B (HB4a) and C (HCC1806). Fusion products are shown with primer pairs 1 and 2 as indicated in part a.
